# Supplementary material for: Efficacy and Safety of DWJ1252 Compared With Gasmotin in the Treatment of Functional Dyspepsia: A Multicenter, Randomized, Double-blind, Active-controlled Study
Source: PubMed Central journal article supplement — J Neurogastroenterol Motil. 2021 Jan 30;27(1):87–96. doi: 10.5056/jnm20061 (PMC7786082; doi:10.5056/jnm20061), 2021-01-30
Supplement: jnm-27-1-87-supple.pdf [file jnm-27-1-87-supple.pdf]

**Supplementary Table 1.** Rates of Global Symptom Improvement at Weeks 2 and 4

| Global improvement<br>PPS | Mosapride citrate SR group<br>(n = 51) | Mosapride citrate CR group<br>(n = 49) | <i>P</i> -value    |
|---------------------------|----------------------------------------|----------------------------------------|--------------------|
| Week 2                    |                                        |                                        |                    |
| Improvement               | 14 (27.5)                              | 19 (38.8)                              | 0.229 <sup>a</sup> |
| Symptom-free              | 1 (2.0)                                | 2 (4.1)                                |                    |
| Markedly improved         | 13 (25.5)                              | 17 (34.7)                              |                    |
| Non-improvement           | 37 (72.6)                              | 30 (61.2)                              |                    |
| Slightly improved         | 32 (62.8)                              | 22 (44.9)                              |                    |
| No change                 | 5 (9.8)                                | 7 (14.3)                               |                    |
| Aggravated                | 0 (0.0)                                | 1 (2.0)                                |                    |
| Week 4                    |                                        |                                        |                    |
| Improvement               | 28 (54.9)                              | 26 (53.1)                              | 0.854 <sup>a</sup> |
| Symptom-free              | 7 (13.7)                               | 8 (16.3)                               |                    |
| Markedly improved         | 21 (41.2)                              | 18 (36.7)                              |                    |
| Non-improvement           | 23 (45.1)                              | 23 (46.9)                              |                    |
| Slightly improved         | 21 (41.2)                              | 17 (34.7)                              |                    |
| No change                 | 2 (3.9)                                | 6 (12.3)                               |                    |
| Aggravated                | 0 (0.0)                                | 0 (0.0)                                |                    |

PPS, per-protocol test.

<sup>a</sup>Pearson's chi-square test.

Data are presented as n (%).

**Supplementary Table 2.** Symptomatic Improvement Rates According to Status of *Helicobacter pylori* Infection at Week 4

| PPS               | Mosapride citrate SR group<br>(n = 51) | Mosapride citrate CR group<br>(n = 49) | P-value            |
|-------------------|----------------------------------------|----------------------------------------|--------------------|
| Positive (n = 31) | n = 16                                 | n = 15                                 |                    |
| Improvement       | 9 (56.3)                               | 8 (53.3)                               | 0.871 <sup>a</sup> |
| Symptom-free      | 3 (18.8)                               | 2 (13.3)                               |                    |
| Markedly improved | 6 (37.5)                               | 6 (40.0)                               |                    |
| Non-improvement   | 7 (43.8)                               | 7 (46.7)                               |                    |
| Slightly improved | 6 (37.5)                               | 5 (33.3)                               |                    |
| No change         | 1 (6.3)                                | 2 (13.3)                               |                    |
| Aggravated        | 0 (0.0)                                | 0 (0.0)                                |                    |
| Negative (n = 69) | n = 35                                 | n = 34                                 |                    |
| Improvement       | 19 (54.3)                              | 18 (53.0)                              | 0.911 <sup>a</sup> |
| Symptom-free      | 4 (11.4)                               | 6 (17.7)                               |                    |
| Markedly improved | 15 (42.9)                              | 12 (35.3)                              |                    |
| Non-improvement   | 16 (45.7)                              | 16 (47.1)                              |                    |
| Slightly improved | 15 (42.9)                              | 12 (35.3)                              |                    |
| No change         | 1 (2.9)                                | 4 (11.8)                               |                    |
| Aggravated        | 0 (0.0)                                | 0 (0.0)                                |                    |

<sup>a</sup>Pearson's chi-square test.  
PPS, per-protocol set.

**Supplementary Table 3.** Symptomatic Improvement Rates According to Functional Dyspepsia Subtype at Week 4

| Subtype                                   | Mosapride citrate SR group | Mosapride citrate CR group | <i>P</i> -value    |
|-------------------------------------------|----------------------------|----------------------------|--------------------|
| Postprandial discomfort syndrome (n = 38) | n = 19                     | n = 19                     |                    |
| Improvement                               | 12 (63.2)                  | 12 (63.2)                  | 1.000 <sup>a</sup> |
| Non-improvement                           | 7 (36.8)                   | 7 (36.8)                   |                    |
| Symptom-free                              | 5 (26.3)                   | 3 (15.8)                   |                    |
| Markedly improved                         | 7 (36.8)                   | 9 (47.4)                   |                    |
| Slightly improved                         | 5 (26.3)                   | 6 (31.6)                   |                    |
| No change                                 | 2 (10.5)                   | 1 (5.3)                    |                    |
| Aggravated                                | 0 (0.0)                    | 0 (0.0)                    |                    |
| Epigastric pain syndrome (n = 3)          | n = 2                      | n = 1                      |                    |
| Improvement                               | 1 (50.0)                   | 1 (100.0)                  | 1.000 <sup>a</sup> |
| Non-improvement                           | 1 (50.0)                   | 0 (0.0)                    |                    |
| Symptom-free                              | 0 (0.0)                    | 0 (0.0)                    |                    |
| Markedly improved                         | 1 (50.0)                   | 1 (100.0)                  |                    |
| Slightly improved                         | 1 (50.0)                   | 0 (0.0)                    |                    |
| No change                                 | 0 (0.0)                    | 0 (0.0)                    |                    |
| Aggravated                                | 0 (0.0)                    | 0 (0.0)                    |                    |

<sup>a</sup>Pearson's chi-square test.
